# Supplementary material
Source: PubMed Central journal article supplement (PMC3628818)

## Differential effects of AGS3 expression on D<sub>2L</sub> dopamine receptor-mediated adenylyl cyclase signaling

Jason M. Conley and Val J. Watts\*

Department of Medicinal Chemistry & Molecular Pharmacology, Purdue University, West Lafayette, IN 47907, USA

\* Corresponding Author: Val J. Watts, 575 Stadium Mall Drive, West Lafayette, IN 47907, USA. E-mail: wattsv@purdue.edu, Telephone: 765-496-3872, Fax: 765-494-1414.

**Online Resource 1** Selective activation of recombinant AC1 by the calcium ionophore, A23187 and recombinant AC2 by the phorbol ester, PMA. **A.** Cell lines expressing recombinant AC1 or **B.** recombinant AC2 were incubated under the indicated conditions and cAMP accumulation was measured using a Cisbio homogenous time-resolved fluorescent (HTRF) cAMP assay kit according to the manufacturer's protocol. Data represent the mean  $\pm$  S.E.M. of three experiments. \*\*  $p < 0.01$ , compared to the basal condition within each cell line (one way ANOVA, followed by Dunnett's post hoc test).

A

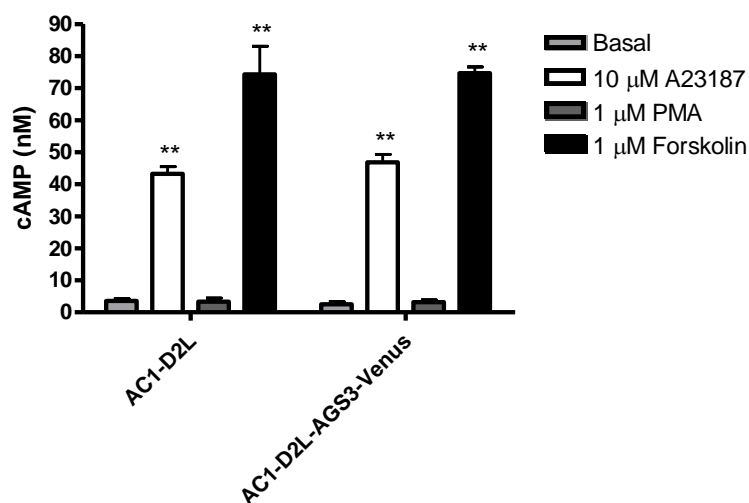

B

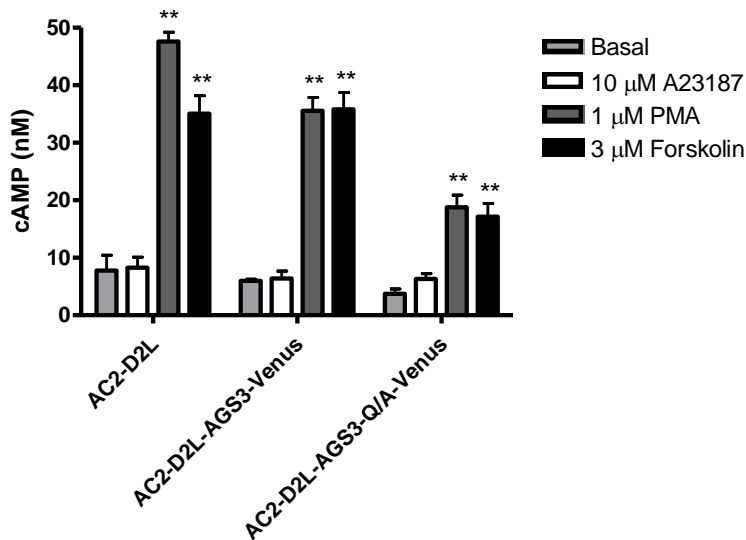

**Online Resource 2** D<sub>2L</sub>DR expression levels in cellular models used for functional studies. [<sup>3</sup>H]-Methylspiperone saturation binding assays and analysis was performed (as described in Przybyla and Watts, 2010) to measure the D<sub>2L</sub>DR expression level in each cell line. Data represent the mean ± S.E.M. of four independent experiments

| Cell Line                               | <i>B</i> <sub>max</sub><br>( <i>pmol/mg</i><br><i>protein</i> ) | <i>K</i> <sub>d</sub><br>( <i>nM</i> ) |
|-----------------------------------------|-----------------------------------------------------------------|----------------------------------------|
| HEK-AC1-D <sub>2L</sub>                 | 2.5±0.10                                                        | 0.10±0.02                              |
| HEK-AC1-D <sub>2L</sub> -AGS3-Venus     | 4.0±0.27                                                        | 0.11±0.02                              |
| HEK-AC2-D <sub>2L</sub>                 | 9.1±2.5                                                         | 0.11±0.01                              |
| HEK-AC2-D <sub>2L</sub> -AGS3-Venus     | 15±3.0                                                          | 0.17±0.04                              |
| HEK-AC2-D <sub>2L</sub> -AGS3-Q/A-Venus | 8.9±2.1                                                         | 0.10±0.01                              |

**Online Resource 3** AGS3-Venus expression by confocal microscopy. Representative fields were imaged for cell lines expressing AGS3 fused to the Venus fluorescent protein at 20X magnification using a Nikon A1 confocal system when excited with the 488 nm laser and filtered for detection of Venus fluorescence (Emission: 525/50)

**AC1-D<sub>2L</sub>-AGS3-Venus**

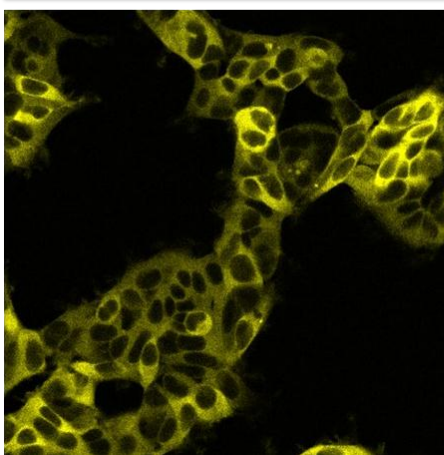

**AC2-D<sub>2L</sub>-AGS3-Venus**

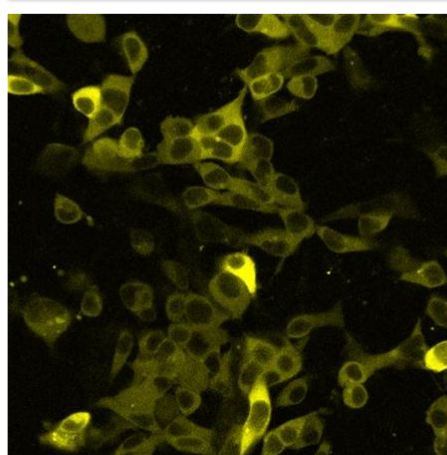

**AC2-D<sub>2L</sub>-AGS3-Q/A-Venus**

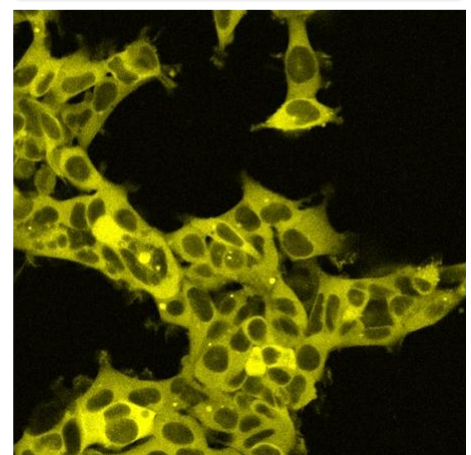

Supplement: NIHMS456972-supplement-10571_2013_9925_MOESM1_ESM.pdf [file NIHMS456972-supplement-10571_2013_9925_MOESM1_ESM.pdf]
